# Supplementary material for: Redox States of Protein Cysteines in Pathways of Protein Turnover and Cytoskeleton Dynamics Are Changed with Aging and Reversed by Slc7a11 Restoration in Mouse Lung Fibroblasts
Source: Hindawi journal article supplement (doi:10.1155/2020/2468986), 2020-06-08
Supplement: f1 [file 2468986.f1.pdf]

# Supplemental Materials

## **Redox states of protein cysteines in pathways of protein turnover and cytoskeleton dynamics are changed with aging and reversed by Slc7a11 restoration in mouse lung fibroblasts**

Yuxuan Zheng,<sup>1</sup> Michael L. Merchant,<sup>1,2</sup> Tom J. Burke,<sup>3</sup> Jeffrey D. Ritzenthaler,<sup>4</sup> Ming Li,<sup>2</sup> Adam E. Gaweda,<sup>2</sup> Frederick W. Benz,<sup>1</sup> Jesse Roman,<sup>4</sup> Walter H. Watson<sup>1,3</sup>

<sup>1</sup> Department of Pharmacology and Toxicology, University of Louisville School of Medicine, Louisville, KY 40202, USA

<sup>2</sup> Department of Medicine, Division of Nephrology and Hypertension, University of Louisville School of Medicine, Louisville, KY 40202, USA

<sup>3</sup> Department of Medicine, Division of Gastroenterology, Hepatology and Nutrition, University of Louisville School of Medicine, Louisville 40202, KY, USA

<sup>4</sup> Department of Medicine, Division of Pulmonary, Allergy and Critical Care Medicine, Sidney Kimmel Medical College and Jane and Leonard Korman Respiratory Institute, Thomas Jefferson University, Philadelphia 19107, PA, USA

Correspondence should be addressed to Walter H. Watson; [bert.watson@louisville.edu](mailto:bert.watson@louisville.edu)

# Emails

Yuxuan Zheng  
yuxuan.zheng@louisville.edu

Michael L. Merchant  
michael.merchant@louisville.edu

Tom J. Burke  
tom.burke@louisville.edu

Jeffrey D. Ritzenthaler  
jeffrey.ritzenthaler@jefferson.edu

Ming Li  
ming.li@louisville.edu

Adam E. Gaweda  
adam.gaweda@louisville.edu

Frederick W. Benz  
frederick.benz@louisville.edu

Jesse Roman  
jesse.roman@jefferson.edu

Walter H. Watson  
bert.watson@louisville.edu

## Supplemental Methods

*Proteasomal activity assay.* Proteasomal activity was measured using the Proteasome-Glo Chymotrypsin-Like and Caspase-Like Cell-Based Assays from Promega (#G8660, #G8860, Madison, WI) according to the manufacturer's instructions. Briefly, primary lung fibroblasts (15,000 cells/well) from young or old female C57BL/6 mice were plated onto a 96 well (white walled) tissue culture plate and incubated in DMEM supplemented with 10% fetal bovine serum (FBS) and 1% antibiotic-antimycotic solution in a humidified incubator with 5% CO<sub>2</sub>. After attachment, cells were treated with or without the addition of 5  $\mu$ M sulforaphane for 6 hours. Afterwards, some fibroblasts were incubated in the presence of a proteasome inhibitor lactacystin (10 $\mu$ M, Cayman Chemical, Ann Arbor, MI) for 2 hours to identify nonspecific protease activity not related to the proteasome. The Proteasome-Glo Cell-Based Reagent (100 $\mu$ l) was then added to each sample and mixed for 2 min at 700 rpm using a plate shaker. Samples were incubated at room temperature for 10 minutes prior to the measurement of luminescence using a Luminoskan Ascent Luminometer (Labsystems, Helsinki, Finland). Samples were normalized to total protein measured using protein assay dye (Bio-Rad, Hercules, CA) and values were reported as relative luciferase units.

Supplemental Figure 1 shows proteasomal activity is lower in old cells, and sulforaphane treatment restores caspase-like, but not chymotrypsin-like, proteasomal activity. This figure is related to Table 1 and described in the 4<sup>th</sup> paragraph of the Discussion section.

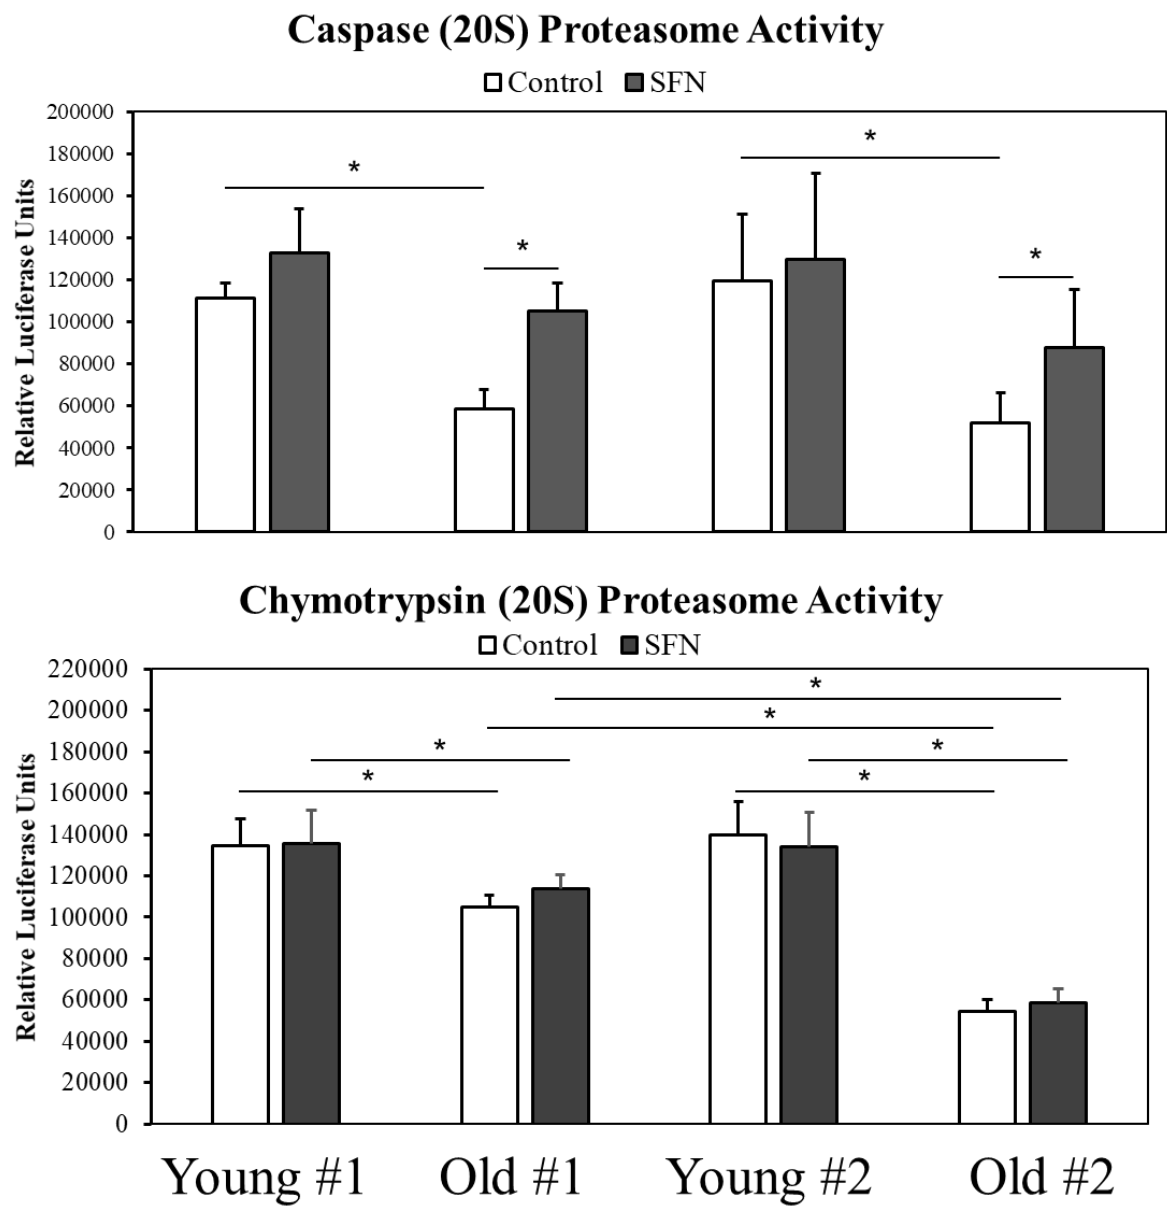

SUPPLEMENTAL FIGURE 1: Caspase-like (top) and chymotrypsin-like (bottom) proteasomal activity. Fibroblasts were isolated from the lungs of 2 Young (#1 and #2) and 2 Old (#1 and #2) female C57BL/6J mice. Caspase-like and chymotrypsin-like proteasomal activity were measured before and after induction of Slc7a11 activity with sulforaphane as described in Supplemental Methods. Both types of proteasomal activity were lower in old cells, but sulforaphane treatment restored only caspase-like proteasomal activity. Fibroblasts from 2 different young mice had similar caspase- and chymotrypsin-like activities. Fibroblasts from both old mice had lower activities than either young mouse, but one biological replicate had even lower chymotrypsin-like activity than the other. Six wells were plated for each condition. \* -  $p < 0.05$  by 2-way ANOVA and Tukey's post-hoc test.

Supplemental Table 1 lists the total 104 proteins with age-dependent Slc7a11-responsive cysteine residues. Those proteins contain at least one cyteine whose redox state becomes more oxidized or reduced with aging and is reversible by Slc7a11 overexpression. This table is related to Figure 4(b) and Table 1 and described in the Results section 3.2. The proteins in this table are used as input for Ingenuity Pathway Analysis.

SUPPLEMENTAL TABLE 1A: Proteins with cysteines whose redox state became more oxidized with aging and restored by Slc7a11 overexpression

| Sequence              | Protein | Description                                                                                                                         | Protein Group Accessions | Modifications                                    |
|-----------------------|---------|-------------------------------------------------------------------------------------------------------------------------------------|--------------------------|--------------------------------------------------|
| CTTHISAAGVPLWK        | Aco2    | Aconitate hydratase, mitochondrial OS=Mus musculus OX=10090 GN=Aco2 PE=1 SV=1 -[ACON MOUSE]                                         | O99KJ0                   | C1(iodoTMTflox);                                 |
| ACLSGLGVYDNDNR        | Actn4   | Alpha-actinin-4 OS=Mus musculus OX=10090 GN=Actn4 PE=1 SV=1 -[ACTN4 MOUSE]                                                          | P57780                   | C2(iodoTMTflox);                                 |
| YSYVCPDLVYK           | Actn3   | Actin-related protein 3 OS=Mus musculus OX=10090 GN=Actn3 PE=1 SV=3 -[ARPY MOUSE]                                                   | P57858                   | C5(iodoTMTflox);                                 |
| HLFLLCGGISTGVGAAVNTAK | Adh5    | Alcohol dehydrogenase class-3 OS=Mus musculus OX=10090 GN=Adh5 PE=1 SV=3 -[ADHX MOUSE]                                              | P28474                   | C2(iodoTMTflox); C6(iodoTMTflox);                |
| EDGDPNPLIR            | Anp2b1  | AP-2 complex subunit beta OS=Mus musculus OX=10090 GN=Anp2b1 PE=1 SV=1 -[AP2B1 MOUSE]                                               | O9DBG3                   | C2(iodoTMTflox);                                 |
| EEAPDILCLOETK         | Ance1   | DNA-(apurinic or arymidinic site) lyase OS=Mus musculus OX=10090 GN=Ance1 PE=1 SV=2 -[APEX1 MOUSE]                                  | P28352                   | C8(iodoTMTflox);                                 |
| NIAFSTNVCVGVAR        | Atin1a1 | Sodium/potassium-translocating ATPase subunit alpha-1 OS=Mus musculus OX=10090 GN=Atin1a1 PE=1 SV=1 -[AT1A1 MOUSE]                  | OSVDN2                   | C9(iodoTMTflox);                                 |
| CGLOFLONVANSR         | Atx1a10 | Ataxin-10 OS=Mus musculus OX=10090 GN=Atx10 PE=1 SV=2 -[ATX10 MOUSE]                                                                | P28658                   | C1(iodoTMTflox);                                 |
| INSTVDNCK             | Capn1   | Adenyl cyclase-associated protein 1 OS=Mus musculus OX=10090 GN=Capn1 PE=1 SV=4 -[CAP1 MOUSE]                                       | P40124                   | C9(iodoTMTflox);                                 |
| TDGFGIDTICR           | Capns1  | Calpain small subunit 1 OS=Mus musculus OX=10090 GN=Capns1 PE=1 SV=1 -[CPNS1 MOUSE]                                                 | O88456                   | C9(iodoTMTflox);                                 |
| CAAOATGIDLTCTCK       | Ccar2   | Cell cycle and aneuploidy regulator protein 2 OS=Mus musculus OX=10090 GN=Ccar2 PE=1 SV=2 -[CCAR2 MOUSE]                            | O8VDP4                   | C1(iodoTMTflox); C13(iodoTMTflox);               |
| DVIERDIEHFCK          | Cc4     | T-complex protein 1 subunit delta OS=Mus musculus OX=10090 GN=Cc4 PE=1 SV=3 -[TCDP MOUSE]                                           | P80315                   | C11(iodoTMTflox);                                |
| LALFEOOLICK           | Chern   | Calcium homeostasis endoplasmic reticulum protein OS=Mus musculus OX=10090 GN=Chern PE=1 SV=1 -[CHERP MOUSE]                        | O8CG20                   | C10(iodoTMTflox);                                |
| AVILDLVDCPK           | Cnmk2   | UMP-CMP kinase 2, mitochondrial OS=Mus musculus OX=10090 GN=Cnmk2 PE=1 SV=2 -[CMPK2 MOUSE]                                          | O3US07                   | C9(iodoTMTflox);                                 |
| DGILCLINK             | Cnn3    | Calponin-3 OS=Mus musculus OX=10090 GN=Cnn3 PE=1 SV=1 -[CNN3 MOUSE]                                                                 | O9DAW9                   | C6(iodoTMTflox);                                 |
| COOLAAYGILEK          | Cnn4    | COP9 signalosome complex subunit 4 OS=Mus musculus OX=10090 GN=Cnn4 PE=1 SV=1 -[CSN4 MOUSE]                                         | O88544                   | C1(iodoTMTflox);                                 |
| YQOFGYGYCPR           | Csnk2b  | Casikin kinase I subunit beta OS=Mus musculus OX=10090 GN=Csnk2b PE=1 SV=1 -[CSK2B MOUSE]                                           | P67781                   | C9(iodoTMTflox);                                 |
| YSVACVYGGTTPYGOOIER   | Ct21    | Nucleolar RNP protein OS=Mus musculus OX=10090 GN=Ct21 PE=1 SV=3 -[DDX21 MOUSE]                                                     | O9HK61                   | C5(iodoTMTflox);                                 |
| HFLLDCECD             | Ddx23b  | Solicoesome RNA helicase Ddx39b OS=Mus musculus OX=10090 GN=Ddx39b PE=1 SV=1 -[DDX39B MOUSE]                                        | O9ZIN5                   | C7(iodoTMTflox);                                 |
| VRPCVYVGAAGQOIOR      | Ddx3x   | ATP-dependent RNA helicase DDX3X OS=Mus musculus OX=10090 GN=Ddx3x PE=1 SV=3 -[DDX3X MOUSE]                                         | O62167                   | C4(iodoTMTflox);                                 |
| GNFEEFYCLK            | Ddx6    | Probable ATP-dependent RNA helicase DDX6 OS=Mus musculus OX=10090 GN=Ddx6 PE=1 SV=1 -[DDX6 MOUSE]                                   | P54823                   | C8(iodoTMTflox);                                 |
| GLYDGPVCEVSVTPK       | Ddvs2   | Dihydrovrimidine-related protein 2 OS=Mus musculus OX=10090 GN=Ddvs2 PE=1 SV=2 -[DDPYL2 MOUSE]                                      | O88553                   | C8(iodoTMTflox);                                 |
| CYLTMTOALLER          | Dhcl1h1 | Cytosolic OX=10090 GN=Dhcl1h1 PE=1 SV=2 -[DHYC1 MOUSE]                                                                              | O9JHJ4                   | C1(iodoTMTflox); M5(Oxidation)                   |
| EYTESSENVCLSK         | Eef2    | Elongation factor 2 OS=Mus musculus OX=10090 GN=Eef2 PE=1 SV=2 -[EF2 MOUSE]                                                         | P58252                   | C11(iodoTMTflox);                                |
| GTTEECIOYLR           | Eif3c   | Eukaryotic translation initiation factor 3 subunit C OS=Mus musculus OX=10090 GN=Eif3c PE=1 SV=1 -[EIF3C MOUSE]                     | O8R1B4                   | C7(iodoTMTflox);                                 |
| IAIWTEECNR            | Eif4e   | Eukaryotic translation initiation factor 4E OS=Mus musculus OX=10090 GN=Eif4e PE=1 SV=1 -[IF4E MOUSE]                               | P63073                   | C8(iodoTMTflox);                                 |
| ACADVPDPFGGAK         | Ghd1    | Glutamate dehydrogenase 1, mitochondrial OS=Mus musculus OX=10090 GN=Ghd1 PE=1 SV=1 -[DHG1 MOUSE]                                   | P26443                   | C11(iodoTMTflox);                                |
| ITOSSLTCTPTEYTGANK    | Gna21   | Guanine nucleotide-binding protein G(i) subunit alpha-2 OS=Mus musculus OX=10090 GN=Gna21 PE=1 SV=5 -[GNA21 MOUSE]                  | P08752                   | C9(iodoTMTflox);                                 |
| CAVADTSTNTNNDPVGR     | Gnb1    | Guanine nucleotide-binding protein G(i)/G(s)/G(t) subunit beta-1 OS=Mus musculus OX=10090 GN=Gnb1 PE=1 SV=3 -[GGB1 MOUSE]           | P62874                   | C2(iodoTMTflox);                                 |
| CGDLVFYAK             | Hdaf    | Hepatoma-derived growth factor OS=Mus musculus OX=10090 GN=Hdaf PE=1 SV=2 -[HDGF MOUSE]                                             | P51859                   | C1(iodoTMTflox);                                 |
| TCNCTEDYDEGK          | Hhnm9   | Isoform 2 of Heterogeneous nuclear ribonucleoprotein U OS=Mus musculus OX=10090 GN=Hhnm9 -[HNRPU MOUSE]                             | O8VEK3-2                 | C2(iodoTMTflox); C4(iodoTMTflox);                |
| AFOWVCGNEALVGR        | Hsd17b1 | Verv-long-chain 3-oxoacyl-CoA reductase OS=Mus musculus OX=10090 GN=Hsd17b12 PE=1 SV=1 -[HDBH12 MOUSE]                              | O70503                   | C6(iodoTMTflox);                                 |
| LECARMDEKEGEGWALLK    | Ifi1    | Interferon-induced protein with tetratricopeptide repeats 1 OS=Mus musculus OX=10090 GN=Ifi1 PE=1 SV=2 -[IFIT1 MOUSE]               | O64282                   | C3(iodoTMTflox); M6(Oxidation); C8(iodoTMTflox); |
| LASAYAGTUDVOCGR       | Ilal3b  | Galectin-3-binding protein OS=Mus musculus OX=10090 GN=Ilal3b PE=1 SV=1 -[ILG3BP MOUSE]                                             | O07797                   | C14(iodoTMTflox);                                |
| CSGLTEDEFR            | Lmb1b   | Lamin-B1 OS=Mus musculus OX=10090 GN=Lmb1b PE=1 SV=3 -[LMNB1 MOUSE]                                                                 | P14733                   | C1(iodoTMTflox);                                 |
| LVCGDHSFVK            | Mnda    | Isoform 2 of Interferon-activable protein 205-B OS=Mus musculus OX=10090 GN=Mnda -[IFISB MOUSE]                                     | P0DOV1-2                 | C3(iodoTMTflox);                                 |
| HHITTLTSAVYEGHVSCKV   | Mtnn1   | Mitrothionin OS=Mus musculus OX=10090 GN=Mtnn1 PE=1 SV=2 -[MTPN MOUSE]                                                              | P62774                   | C17(iodoTMTflox);                                |
| OXKLEIHCHELEK         | Mvsn9   | Mvsn9 OS=Mus musculus OX=10090 GN=Mvsn9 PE=1 SV=4 -[MYI9 MOUSE]                                                                     | O8VDH5                   | C9(iodoTMTflox);                                 |
| LDMDTINELLICR         | Nars    | Asenarsine-RNA lyase, cytosolic OS=Mus musculus OX=10090 GN=Nars PE=1 SV=2 -[SYNC MOUSE]                                            | O8BP47                   | M2(Oxidation); C13(iodoTMTflox);                 |
| ISPDNLTYCK            | Nop58   | Nucleolar protein 58 OS=Mus musculus OX=10090 GN=Nop58 PE=1 SV=1 -[NOP58 MOUSE]                                                     | O6DFW4                   | C9(iodoTMTflox);                                 |
| VYPIPEPDGCK           | Noc2    | NPC intracellular cholesterol transporter 2 OS=Mus musculus OX=10090 GN=Noc2 PE=1 SV=1 -[NPC2 MOUSE]                                | O9Z020                   | C11(iodoTMTflox);                                |
| CGTIVSOVSNWFGNK       | Pbx1    | Interferon PBX1 of Pre-B-cell leukemia transcription factor 1 OS=Mus musculus OX=10090 GN=Pbx1 -[PBX1 MOUSE]                        | P41778-2                 | C11(iodoTMTflox);                                |
| ACTGSLNMTLOR          | Pd2     | PDZ and LIM domain protein 5 OS=Mus musculus OX=10090 GN=Pd2 PE=1 SV=1 -[PDZ5 MOUSE]                                                | P27655                   | C11(iodoTMTflox); M8(Oxidation)                  |
| EFVSSSDTDDPMFAK       | Plod3   | Procollagen-lysine 2-oxoglutarate 5-dioxygenase 3 OS=Mus musculus OX=10090 GN=Plod3 PE=1 SV=1 -[PLOD3 MOUSE]                        | O9R0E1                   | M12(Oxidation); C15(iodoTMTflox);                |
| DHNLPGFCGNPLIR        | Pnp     | Purine nucleoside phosphorylase OS=Mus musculus OX=10090 GN=Pnp PE=1 SV=2 -[PNPH MOUSE]                                             | P23492                   | C9(iodoTMTflox);                                 |
| EVGETTLLYYGCR         | Por     | NADPH-cytochrome P450 reductase OS=Mus musculus OX=10090 GN=Por PE=1 SV=2 -[INCRP MOUSE]                                            | P37040                   | C11(iodoTMTflox);                                |
| IGSCMNTVTSIEPFK       | Psa1    | Isoform 1 of Nucleoside diphosphate kinase OS=Mus musculus OX=10090 GN=Psa1 PE=1 SV=1 -[IPYK MOUSE]                                 | O9D819                   | C4(iodoTMTflox); M5(Oxidation)                   |
| OLVNTAGLIR            | Psm1    | Protein-1 OS=Mus musculus OX=10090 GN=Psm1 PE=1 SV=1 -[PAMI MOUSE]                                                                  | O9JH31                   | C7(iodoTMTflox);                                 |
| YGVETPMDLIR           | Psm6a   | Proteasome subunit alpha type-6 OS=Mus musculus OX=10090 GN=Psm6a PE=1 SV=1 -[POM6A MOUSE]                                          | O9OUM9                   | N9(Oxidation); C11(iodoTMTflox);                 |
| TANAIYCPPK            | Psmd11  | 26S proteasome non-ATPase regulatory subunit 11 OS=Mus musculus OX=10090 GN=Psmd11 PE=1 SV=3 -[PSD11 MOUSE]                         | O8BG32                   | C8(iodoTMTflox);                                 |
| SDEAVILCK             | Psmd13  | 26S proteasome non-ATPase regulatory subunit 13 OS=Mus musculus OX=10090 GN=Psmd13 PE=1 SV=1 -[PSD13 MOUSE]                         | O9WVJ2                   | C9(iodoTMTflox);                                 |
| GGINNEPLVDCGYEPR      | Psmd9   | 26S proteasome non-ATPase regulatory subunit 9 OS=Mus musculus OX=10090 GN=Psmd9 PE=1 SV=1 -[PSMD9 MOUSE]                           | O9CR00                   | M4(Oxidation); C11(iodoTMTflox);                 |
| VOCHYEYTGFEK          | Pur1    | Protein-1 OS=Mus musculus OX=10090 GN=Pur1 PE=1 SV=2 -[PTGR1 MOUSE]                                                                 | O91YB2                   | C11(iodoTMTflox);                                |
| VOSETEAOAWCK          | Rab9a   | Ras-related protein Rab-9A OS=Mus musculus OX=10090 GN=Rab9a PE=1 SV=1 -[RAB9A MOUSE]                                               | O9ORM6                   | C11(iodoTMTflox);                                |
| SPACFTLOELK           | Ranap1  | Ran GTPase-activating protein 1 OS=Mus musculus OX=10090 GN=Ranap1 PE=1 SV=2 -[RAGP1 MOUSE]                                         | P46061                   | C4(iodoTMTflox);                                 |
| YGCLSGVR              | Rcc2    | Protein RCC2 OS=Mus musculus OX=10090 GN=Rcc2 PE=1 SV=1 -[RCC2 MOUSE]                                                               | O8BK67                   | C3(iodoTMTflox);                                 |
| DAVICTVR              | Rell1   | 60S ribosomal protein L11 OS=Mus musculus OX=10090 GN=Rell1 PE=1 SV=4 -[RL11 MOUSE]                                                 | O9CXW4                   | C5(iodoTMTflox);                                 |
| VACIGAWIPAR           | Rel3    | 60S ribosomal protein L3 OS=Mus musculus OX=10090 GN=Rel3 PE=1 SV=3 -[RL3 MOUSE]                                                    | P37655                   | C3(iodoTMTflox);                                 |
| WGSVSOAOK             | Rn9     | 60S ribosomal protein L9 OS=Mus musculus OX=10090 GN=Rn9 PE=2 SV=2 -[RL9 MOUSE]                                                     | P51410                   | C5(iodoTMTflox);                                 |
| GCTATLGNFAK           | Rps2    | 40S ribosomal protein S2 OS=Mus musculus OX=10090 GN=Rps2 PE=1 SV=3 -[RS2 MOUSE]                                                    | P25444                   | C2(iodoTMTflox);                                 |
| LNISFPATGCK           | Rso6    | 40S ribosomal protein S6 OS=Mus musculus OX=10090 GN=Rso6 PE=1 SV=1 -[RS6 MOUSE]                                                    | P62754                   | C10(iodoTMTflox);                                |
| VOENLOEGCK            | Sdha    | Succinate dehydrogenase [ubiquinone] flavoprotein subunit, mitochondrial OS=Mus musculus OX=10090 GN=Sdha PE=1 SV=1 -[SDHA MOUSE]   | O8K2B3                   | C9(iodoTMTflox);                                 |
| CGTLEER               | Sf3a3   | Soluble factor 3 OS=Mus musculus OX=10090 GN=Sf3a3 PE=1 SV=2 -[SFA3 MOUSE]                                                          | O9D543                   | C9(iodoTMTflox);                                 |
| VOGNDILVGR            | Sf3B1   | Soluble factor 3B subunit 1 OS=Mus musculus OX=10090 GN=Sf3B1 PE=1 SV=1 -[SFB1 MOUSE]                                               | O9UNB9                   | C5(iodoTMTflox);                                 |
| GLMDVTVCK             | Skip1   | S-phase kinase-associated protein 1 OS=Mus musculus OX=10090 GN=Skip1 PE=1 SV=3 -[SKP1 MOUSE]                                       | O9WXT5                   | C7(iodoTMTflox);                                 |
| HNMLVENVK             | Snrnd2  | Small nuclear ribonucleoprotein Sm D2 OS=Mus musculus OX=10090 GN=Snrnd2 PE=1 SV=1 -[SMD2 MOUSE]                                    | P62317                   | C2(iodoTMTflox); M4(Oxidation)                   |
| CLIMFLOEEAIR          | Sns12   | Sorin nexin-12 OS=Mus musculus OX=10090 GN=Sns12 PE=1 SV=1 -[SNS12 MOUSE]                                                           | O70493                   | C11(iodoTMTflox); M4(Oxidation)                  |
| CNSLEIK               | Sntn1   | Isoform 2 of Spectrin alpha chain, non-erythrocyte 1 OS=Mus musculus OX=10090 GN=Sntn1 -[SPTN1 MOUSE]                               | P15546-2                 | C1(iodoTMTflox);                                 |
| LGLOIEVYASSCIPR       | Srm2    | Isoform 3 of Serine/arginine repetitive matrix protein 2 OS=Mus musculus OX=10090 GN=Srm2 -[SRRM2 MOUSE]                            | O8BTR3                   | C12(iodoTMTflox);                                |
| LGFGNCPVINPECK        | Suc1e   | Succinate-CoA lyase [ADP/GDP-forming] subunit alpha, mitochondrial OS=Mus musculus OX=10090 GN=Suc1e PE=1 SV=4 -[SUCA MOUSE]        | O9WUM5                   | C6(iodoTMTflox); C15(iodoTMTflox);               |
| CDFAEYTMGTEIOR        | Tomn70  | Mitochondrial import receptor subunit TOM70 OS=Mus musculus OX=10090 GN=Tomn70 PE=1 SV=2 -[ITOM70 MOUSE]                            | O9CZW5                   | C7(iodoTMTflox);                                 |
| CVFPEPNENDK           | Vana    | Vesicle-associated membrane protein-associated protein A OS=Mus musculus OX=10090 GN=Vana PE=1 SV=2 -[VAPA MOUSE]                   | O9WV55                   | C11(iodoTMTflox); M5(Oxidation)                  |
| PCPVLPGDGLDLVLR       | Zad2b   | Protein-1 OS=Mus musculus OX=10090 GN=Zad2b PE=1 SV=1 -[PTGR1 MOUSE]                                                                | O8BKA1                   | C9(iodoTMTflox);                                 |
| IPGIEDSSCLVR          | Ct3     | T-complex protein 1 subunit gamma OS=Mus musculus OX=10090 GN=Ct3 PE=1 SV=1 -[TCGP MOUSE]                                           | O80318                   | C10(iodoTMTflox);                                |
| DOGSCGWCFAVEAISDR     | Ct5b    | Cathepsin B OS=Mus musculus OX=10090 GN=Ct5b PE=1 SV=2 -[CATB MOUSE]                                                                | P10605                   | C5(iodoTMTflox); C8(iodoTMTflox);                |
| TCHTNGR               | Ct5b    | Cathepsin B OS=Mus musculus OX=10090 GN=Ct5b PE=1 SV=2 -[CATB MOUSE]                                                                | P10605                   | C2(iodoTMTflox);                                 |
| AHCCHVNTPGSFQYCK      | Fbn2b   | Isoform 2 of Fibulin-2 OS=Mus musculus OX=10090 GN=Fbn2b -[FBN2 MOUSE]                                                              | P37889-2                 | C4(iodoTMTflox); C13(iodoTMTflox);               |
| CSCAAGFLNPLADVGR      | Fbn2c   | Isoform 2 of Fibulin-2 OS=Mus musculus OX=10090 GN=Fbn2c -[FBN2 MOUSE]                                                              | P37889-2                 | C1(iodoTMTflox);                                 |
| CGEGOLCYNLPLGMR       | Fbn2c   | Isoform 2 of Fibulin-2 OS=Mus musculus OX=10090 GN=Fbn2c -[FBN2 MOUSE]                                                              | P37889-2                 | C1(iodoTMTflox); C7(iodoTMTflox);                |
| CSGPLSPGMVSR          | Flna    | Filamin-A OS=Mus musculus OX=10090 GN=Flna PE=1 SV=5 -[FLNA MOUSE]                                                                  | O8BTM8                   | C1(iodoTMTflox); M10(Oxidation)                  |
| SNFVTDCK              | Flna    | Filamin-A OS=Mus musculus OX=10090 GN=Flna PE=1 SV=5 -[FLNA MOUSE]                                                                  | O8BTM8                   | C7(iodoTMTflox);                                 |
| ACTIPSTVDSSK          | Flnb    | Filamin-B OS=Mus musculus OX=10090 GN=Flnb PE=1 SV=3 -[FLNB MOUSE]                                                                  | O8OX90                   | C2(iodoTMTflox);                                 |
| IAGPLGSSCVR           | Flnb    | Filamin-B OS=Mus musculus OX=10090 GN=Flnb PE=1 SV=3 -[FLNB MOUSE]                                                                  | O8OX90                   | C9(iodoTMTflox);                                 |
| CTDEPPOLOSR           | Gvin1   | Interferon-induced very large GTPase 1 OS=Mus musculus OX=10090 GN=Gvin1 PE=1 SV=1 -[GVINI MOUSE]                                   | O8OSU7                   | C1(iodoTMTflox);                                 |
| CWESVDFPEOLTK         | Gvin1   | Interferon-induced very large GTPase 1 OS=Mus musculus OX=10090 GN=Gvin1 PE=1 SV=1 -[GVINI MOUSE]                                   | O8OSU7                   | C1(iodoTMTflox);                                 |
| OITOVYFYDECLR         | Poe2ca  | Serine/threonine-protein phosphatase 2A catalytic subunit alpha isoform OS=Mus musculus OX=10090 GN=Poe2ca PE=1 SV=1 -[PP2AA MOUSE] | P63330                   | C12(iodoTMTflox);                                |
| AHVMYGVGNVCHDR        | Poe2ca  | Serine/threonine-protein phosphatase 2A catalytic subunit alpha isoform OS=Mus musculus OX=10090 GN=Poe2ca PE=1 SV=1 -[PP2AA MOUSE] | P63330                   | M6(Oxidation); C12(iodoTMTflox);                 |
| SEGYTCYCPVSVR         | Tmn2    | Protein-glutamine gamma-glutamyltransferase 2 OS=Mus musculus OX=10090 GN=Tmn2 PE=1 SV=4 -[TGM2 MOUSE]                              | P21981                   | C6(iodoTMTflox); C7(iodoTMTflox);                |
| VVOLAMNNDGQVLLGR      | Tln1    | Talin-1 OS=Mus musculus OX=10090 GN=Tln1 PE=1 SV=2 -[TLN1 MOUSE]                                                                    | P21981                   | M5(Oxidation); C8(iodoTMTflox);                  |
| VVAPITSSVPCQOLVEAGR   | Tln1    | Talin-1 OS=Mus musculus OX=10090 GN=Tln1 PE=1 SV=2 -[TLN1 MOUSE]                                                                    | P26039                   | C11(iodoTMTflox);                                |
| AGALOCSPDVYTK         | Tln1    | Talin-1 OS=Mus musculus OX=10090 GN=Tln1 PE=1 SV=2 -[TLN1 MOUSE]                                                                    | P26039                   | C6(iodoTMTflox);                                 |
| CVSLPGOR              | Tln1    | Talin-1 OS=Mus musculus OX=10090 GN=Tln1 PE=1 SV=2 -[TLN1 MOUSE]                                                                    | P26039                   | C1(iodoTMTflox); C4(iodoTMTflox);                |
| OYAASTAOLLVACK        | Tln1    | Talin-1 OS=Mus musculus OX=10090 GN=Tln1 PE=1 SV=2 -[TLN1 MOUSE]                                                                    | P26039                   | C13(iodoTMTflox);                                |

Total 93 oxidized Cys in 82 proteins (Cct3 contains both oxidized and reduced Cys)

SUPPLEMENTAL TABLE 1B: Proteins with cysteines whose redox state became more reduced with aging and restored by Slc7a11 overexpression

| Sequence                   | Protein | Description                                                                                                                   | Protein Group Accessions | Modifications                                  |
|----------------------------|---------|-------------------------------------------------------------------------------------------------------------------------------|--------------------------|------------------------------------------------|
| LCYVALDFEOMATAASSSLEK      | Actb    | Actin, cytoplasmic 1 OS=Mus musculus OX=10090 GN=Actb PE=1 SV=1 -[ACTB MOUSE]                                                 | P60710                   | C2(iodoTMTflox); M12(Oxidation)                |
| CTGLDEDSLEIICRS            | Anxa2   | Annexin A2 OS=Mus musculus OX=10090 GN=Anxa2 PE=1 SV=2 -[ANXA2 MOUSE]                                                         | P07356                   | C14(iodoTMTflox);                              |
| ECTIEATA                   | Cabp    | Isoform 2 of Cellular nuclear actin-binding protein OS=Mus musculus OX=10090 GN=Cabp -[CNBP MOUSE]                            | P53996-2                 | C2(iodoTMTflox);                               |
| VADPVYTCETVETVETSLK        | Ehd2    | 116 kDa US small nuclear ribonucleoprotein component OS=Mus musculus OX=10090 GN=Ehd2 PE=1 SV=1 -[USS1 MOUSE]                 | O08810                   | C9(iodoTMTflox);                               |
| FMAOALPNPLVDSIDDTPLGSGEK   | Ehd1    | EH domain-containing protein 1 OS=Mus musculus OX=10090 GN=Ehd1 PE=1 SV=1 -[EHD1 MOUSE]                                       | O9WVK4                   | M2(Oxidation); C3(iodoTMTflox);                |
| IVLTNPCTVEGKEK             | Eif2s3x | Eukaryotic translation initiation factor 2 subunit 3, X-linked OS=Mus musculus OX=10090 GN=Eif2s3x PE=1 SV=2 -[IF2G MOUSE]    | O9Z0N1                   | C8(iodoTMTflox);                               |
| THGLSDEHVFVEYICSPGQFSEASSK | Enh1c1  | Enoide hydrolase 1 OS=Mus musculus OX=10090 GN=Enh1c1 PE=1 SV=2 -[HYEP MOUSE]                                                 | O9D379                   | C14(iodoTMTflox);                              |
| DGSGCVSVYVQEGDGYEVYSIK     | Finc    | Isoform 2 of Filamin-C OS=Mus musculus OX=10090 GN=Finc -[FLNC MOUSE]                                                         | O8VHX6-2                 | C4(iodoTMTflox);                               |
| ACAEITDPAWLEY              | Fscn1   | Fascin OS=Mus musculus OX=10090 GN=Fscn1 PE=1 SV=4 -[FSCN1 MOUSE]                                                             | P61553                   | C2(iodoTMTflox);                               |
| ASADLMSYCEEIAR             | Gne12   | Guanine nucleotide-binding protein G(i)/G(s)/G(o) subunit gamma-12 OS=Mus musculus OX=10090 GN=Gne12 PE=1 SV=3 -[GBG12 MOUSE] | O9DAS9                   | M6(Oxidation); C9(iodoTMTflox);                |
| NTLOPSTC                   | Hars    | Histidine-RNA lyase, cytosolic OS=Mus musculus OX=10090 GN=Hars PE=1 SV=2 -[SYHC MOUSE]                                       | O61035                   | C9(iodoTMTflox);                               |
| CESSSSDVLNIDPVLTMASGPK     | Hsna9   | Stress-70 protein, mitochondrial OS=Mus musculus OX=10090 GN=Hsna9 PE=1 SV=3 -[GRP75 MOUSE]                                   | P38647                   | C1(iodoTMTflox); M18(Oxidation)                |
| CATTIDPK                   | Ikb1    | Isoform 2 of Filamin-C OS=Mus musculus OX=10090 GN=Ikb1 PE=1 SV=2 -[IDHC MOUSE]                                               | O88844                   | C1(iodoTMTflox);                               |
| FOVACDVPLEODK              | Ikbm1   | Ras GTPase-activating-like protein IKGAP1 OS=Mus musculus OX=10090 GN=Ikbm1 PE=1 SV=2 -[IKGAP1 MOUSE]                         | O9JKF1                   | C9(iodoTMTflox);                               |
| YNLGAPVAGTGYOAEWDVYVPE     | Pebp1   | Phosphatidylethanolamine-binding protein 1 OS=Mus musculus OX=10090 GN=Pebp1 PE=1 SV=3 -[PEBP1 MOUSE]                         | P70296                   | C11(iodoTMTflox);                              |
| VCTOLOVLEAFR               | Pefl    | Peflin OS=Mus musculus OX=10090 GN=Pefl PE=1 SV=1 -[PEFL MOUSE]                                                               | O8BFY6                   | C1(iodoTMTflox);                               |
| IKVITC                     | Psmb1   | Proteasome subunit beta type-1 OS=Mus musculus OX=10090 GN=Psmb1 PE=1 SV=1 -[PSB1 MOUSE]                                      | O90961                   | C2(iodoTMTflox);                               |
| OLGONOLEAK                 | Rai14   | Ankyrin protein OS=Mus musculus OX=10090 GN=Rai14 PE=1 SV=1 -[RAI14 MOUSE]                                                    | O9EP71                   | C9(iodoTMTflox);                               |
| CAEAGANMVEGSGAIMR          | Rre     | Ribulose-bisphosphate 3-carboxismutase OS=Mus musculus OX=10090 GN=Rre PE=1 SV=1 -[RPE MOUSE]                                 | O8VEE0                   | C1(iodoTMTflox); M8(Oxidation); M16(Oxidation) |
| ALGACDLFTISPK              | Taldo1  | Transaldolase OS=Mus musculus OX=10090 GN=Taldo1 PE=1 SV=2 -[TALDO1 MOUSE]                                                    | O93092                   | C5(iodoTMTflox);                               |
| SOLC3SOLIEFR               | Uso1    | Isoform 4 of General vesicular transport factor p115 OS=Mus musculus OX=10090 GN=Uso1 -[USO1 MOUSE]                           | O9Z1Z0-4                 | C4(iodoTMTflox);                               |
| MEDSGVYVCEGVNLIGR          | Vcam1   | Vascular cell adhesion protein 1 OS=Mus musculus OX=10090 GN=Vcam1 PE=1 SV=1 -[VCAM1 MOUSE]                                   | P29533                   | M1(Oxidation); C9(iodoTMTflox);                |
| GLYVYTFITIDCK              | Cc3     | T-complex protein 1 subunit gamma OS=Mus musculus OX=10090 GN=Cc3 PE=1 SV=1 -[TCGP MOUSE]                                     | P80318                   | C12(iodoTMTflox);                              |

Total 23 reduced Cys in 23 proteins (Cct3 contains both oxidized and reduced Cys)

Total 104 proteins with age-dependent Slc7a11-responsive Cys

Supplemental Table 2 provides IPA analysis of proteins whose redox state changes with Slc7a11 overexpression in old fibroblasts regardless of their redox states in young fibroblasts. Cysteine redox states were compared between old fibroblasts and old Slc7a11-overexpressing fibroblasts. This table is described in the Results section 3.2.

SUPPLEMENTAL TABLE 2: IPA analysis of proteins whose redox states were changed by Slc7a11 overexpression in old fibroblasts. Fisher’s exact test *p*-values for all the items shown were less than 0.05.

| Name                                              | p-value  | Overlap      |
|---------------------------------------------------|----------|--------------|
| Regulation of eIF4 and p70S6K Signaling           | 2.09E-09 | 6.4 % 10/157 |
| EIF2 Signaling                                    | 6.26E-08 | 4.5 % 10/224 |
| mTOR Signaling                                    | 4.53E-06 | 3.8 % 8/210  |
| Antiproliferative Role of Somatostatin Receptor 2 | 2.41E-05 | 6.5 % 5/77   |
| Relaxin Signaling                                 | 5.68E-05 | 4.0 % 6/150  |

Supplemental Table 3 provides IPA analysis of age-dependent proteins whose redox states were not rescued by Slc7a11 overexpression in old fibroblasts. Those age-dependent Slc7a11-nonresponsive protein cysteines indicate there are Slc7a11-independent regulation of protein redox signaling. This table is described in the Results section 3.3.

SUPPLEMENTAL TABLE 3: IPA analysis of age-dependent proteins whose redox states were not rescued by Slc7a11 overexpression in old fibroblasts. Fisher’s exact test *p*-values for all the items shown were less than 0.05.

| Name                                                | p-value  | Overlap     |
|-----------------------------------------------------|----------|-------------|
| Hepatic Fibrosis / Hepatic Stellate Cell Activation | 3.27E-05 | 2.7 % 5/186 |
| Protein Ubiquitination Pathway                      | 2.00E-04 | 1.8 % 5/273 |
| Epithelial Adherens Junction Signaling              | 2.32E-04 | 2.6 % 4/152 |
| Actin Cytoskeleton Signaling                        | 9.04E-04 | 1.8 % 4/218 |
| EIF2 Signaling                                      | 1.00E-03 | 1.8 % 4/224 |

Supplemental Table 4 provides GO-based biological process analysis of proteins whose redox states were not rescued by Slc7a11 overexpression in old fibroblasts. Those age-dependent Slc7a11-nonresponsive protein cysteines indicate there are Slc7a11-independent regulation of protein redox signaling. This table is described in the Results section 3.3.

SUPPLEMENTAL TABLE 4: GO-based biological process analysis of proteins whose redox states were not rescued by Slc7a11 overexpression in old fibroblasts. Fisher’s exact test *p*-values for all the items shown were less than 0.05.

| Term                                          | Count | p-value | -log10 (p-value) |
|-----------------------------------------------|-------|---------|------------------|
| protein folding                               | 6     | <0.001  | 4.845            |
| wound healing                                 | 4     | 0.002   | 2.811            |
| actomyosin structure organization             | 3     | 0.002   | 2.709            |
| mitotic cytokinesis                           | 3     | 0.002   | 2.618            |
| translation                                   | 6     | 0.003   | 2.554            |
| skin development                              | 3     | 0.009   | 2.057            |
| IRES-dependent viral translational initiation | 2     | 0.017   | 1.772            |
| platelet degranulation                        | 2     | 0.019   | 1.714            |
| heart development                             | 4     | 0.025   | 1.594            |
| cytoskeleton organization                     | 3     | 0.026   | 1.577            |
| single organismal cell-cell adhesion          | 3     | 0.028   | 1.547            |
| cerebellar Purkinje cell layer development    | 2     | 0.038   | 1.417            |
| actin filament-based movement                 | 2     | 0.041   | 1.392            |
| actin filament capping                        | 2     | 0.043   | 1.367            |
